# Supplementary material
Source: PubMed Central journal article supplement (PMC3896052)
Supplement: NIHMS538429-supplement-01.pdf [file NIHMS538429-supplement-01.pdf]

Supplemental Table e-1: Plasma lipids and A $\beta$ -status.

|                              |         | <u>Total</u> |      | <u>A<math>\beta</math>-positive</u> |      | <u>A<math>\beta</math>-negative</u> |      | p-value | Odds of being A $\beta$ -positive |       |      |
|------------------------------|---------|--------------|------|-------------------------------------|------|-------------------------------------|------|---------|-----------------------------------|-------|------|
|                              |         | (n=175)      |      | (n = 97)                            |      | (n = 78)                            |      |         | OR                                | 95%CI |      |
|                              |         | mean         | std  | mean                                | std  | mean                                | std  |         |                                   |       |      |
| <i>Oxysterol metabolites</i> |         |              |      |                                     |      |                                     |      |         |                                   |       |      |
| 24OHC                        | (ng/mL) | 37.6         | 11.7 | 37.9                                | 10.9 | 37.3                                | 11.3 | 0.713   | 1.03                              | 0.76  | 1.41 |
| 27OHC                        | (ng/mL) | 170.0        | 47.6 | 167.4                               | 49.3 | 172.2                               | 46.2 | 0.506   | 0.93                              | 0.69  | 1.26 |
| Ratio 24/Chol                |         | 0.24         | 0.08 | 0.24                                | 0.08 | 0.23                                | 0.07 | 0.377   | 1.13                              | 0.83  | 1.54 |
| Ratio 27/Chol                |         | 1.07         | 0.35 | 1.06                                | 0.36 | 1.09                                | 0.35 | 0.583   | 0.95                              | 0.69  | 1.31 |
| Ratio 24/27                  |         | 0.23         | 0.09 | 0.24                                | 0.10 | 0.23                                | 0.09 | 0.216   | 1.17                              | 0.84  | 1.62 |
| <i>Plasma lipids</i>         |         |              |      |                                     |      |                                     |      |         |                                   |       |      |
| Cholesterol                  | (mg/dL) | 163.1        | 32.1 | 162.6                               | 31.2 | 163.1                               | 33.1 | 0.919   | 0.95                              | 0.69  | 1.31 |
| LDL                          | (mg/dL) | 87.9         | 27.6 | 87.1                                | 25.9 | 88.5                                | 29.6 | 0.739   | 0.92                              | 0.67  | 1.25 |
| HDL                          | (mg/dL) | 49.2         | 13.4 | 50.3                                | 13.9 | 47.6                                | 12.6 | 0.173   | 1.25                              | 0.89  | 1.76 |
| Triglycerides                | (mg/dL) | 131.3        | 62.3 | 128.3                               | 64.3 | 135.0                               | 60.5 | 0.480   | 0.90                              | 0.67  | 1.23 |
| <i>Apolipoproteins</i>       |         |              |      |                                     |      |                                     |      |         |                                   |       |      |
| Clusterin                    | (mg/dL) | 37.6         | 9.4  | 38.3                                | 10.4 | 37.1                                | 8.1  | 0.403   | 1.12                              | 0.82  | 1.52 |
| Plasma ApoE                  | (mg/dL) | 3.4          | 0.9  | 3.3                                 | 0.9  | 3.4                                 | 0.8  | 0.183   | 0.76                              | 0.55  | 1.04 |

\*Standardized odds ratio and 95%CI adjusted for age, gender and statin use
